# Supplementary material
Source: PubMed Central journal article supplement (PMC5319926)
Supplement: NIHMS846985-supplement-1.pdf [file NIHMS846985-supplement-1.pdf]

**Table 1 Data collection and refinement statistics**

|                                                       | 5SW8                                          | 5SWG                                          | 5SWO                                          | 5SWP                                          | 5SWR                                          | 5SWT                                          | 5SX8                                          |
|-------------------------------------------------------|-----------------------------------------------|-----------------------------------------------|-----------------------------------------------|-----------------------------------------------|-----------------------------------------------|-----------------------------------------------|-----------------------------------------------|
| Fragments                                             | 7, 12                                         | 5, 21                                         | 4, 16                                         | 6, 24                                         | 20, 26                                        | 17, 27                                        | 13, 15                                        |
| <b>Data collection</b>                                |                                               |                                               |                                               |                                               |                                               |                                               |                                               |
| Space group                                           | p2 <sub>1</sub> 2 <sub>1</sub> 2 <sub>1</sub> |
| Cell dimensions<br><i>a</i> , <i>b</i> , <i>c</i> (Å) | 115.6, 117.8,<br>152.9                        | 114.5,<br>116.7, 149.5                        | 114.8, 116.4,<br>149.4                        | 114.1, 116.1,<br>148.3                        | 114.2, 116.3,<br>149.3                        | 114.5, 115.9,<br>149.3                        | 113.9, 116.3,<br>148.0                        |
| Resolution (Å)                                        | 50-3.30<br>(3.37-3.30)                        | 50-3.12<br>(3.23-3.12)                        | 50-3.50<br>(3.63-3.50)                        | 50-3.40<br>(3.52-3.40)                        | 50.00-3.30<br>(3.42-3.30)                     | 50.00-<br>3.50(3.56-<br>3.50)                 | 50-3.45<br>(3.57-3.45)                        |
| <i>R</i> <sub>sym</sub>                               | 0.101 (0.734)                                 | 0.085 (0.709)                                 | 0.130 (0.601)                                 | 0.121 (0.875)                                 | 0.097 (0.639)                                 | 0.123 (0.973)                                 | 0.098 (0.925)                                 |
| <i>I</i> / $\sigma$ <i>I</i>                          | 26.5 (2.4)                                    | 27.1 (2.1)                                    | 15.2 (2.0)                                    | 17.3 (2.0)                                    | 27.5 (2.5)                                    | 19.2 (1.8)                                    | 24.2 (1.8)                                    |
| Completeness (%)                                      | 99.9 (99.7)                                   | 99.9 (98.8)                                   | 99.7 (98.1)                                   | 99.9 (99.9)                                   | 99.7 (98.8)                                   | 100 (100)                                     | 99.9 (100)                                    |
| Redundancy                                            | 7.1 (6.7)                                     | 7.2 (6.1)                                     | 6.8 (5.0)                                     | 6.7 (6.3)                                     | 7.2 (6.5)                                     | 7.3 (7.5)                                     | 7.3 (7.4)                                     |
| Unique reflections                                    | 31,971                                        | 36,555                                        | 25,700                                        | 27,455                                        | 30,235                                        | 25,886                                        | 25,993                                        |
| Total reflections                                     | 226,811                                       | 263,120                                       | 174,299                                       | 184,879                                       | 216,686                                       | 188,483                                       | 188,731                                       |
| X-ray Source<br>wavelength                            | 1.0                                           | 1.0                                           | 1.0                                           | 1.0                                           | 1.0                                           | 1.0                                           | 1.0                                           |
| <b>Refinement</b>                                     |                                               |                                               |                                               |                                               |                                               |                                               |                                               |
| Resolution (Å)                                        | 93.24-3.30                                    | 49.14-3.11                                    | 48.73-3.50                                    | 48.91-3.41                                    | 48.54-3.31                                    | 92.57-3.50                                    | 91.49-3.47                                    |
| No. reflections                                       | 30,096                                        | 34,630                                        | 24,324                                        | 25,928                                        | 28,638                                        | 24,456                                        | 24,618                                        |
| <i>R</i> <sub>work</sub> / <i>R</i> <sub>free</sub>   | 0.225/0.298                                   | 0.206/0.261                                   | 0.188/0.274                                   | 0.215/0.296                                   | 0.197/0.272                                   | 0.208/0.284                                   | 0.207/0.275                                   |
| No. atoms                                             |                                               |                                               |                                               |                                               |                                               |                                               |                                               |
| Protein                                               | 10,166                                        | 10,695                                        | 10,864                                        | 10,852                                        | 10,748                                        | 10,781                                        | 10,657                                        |
| Ligand                                                | 57                                            | 28                                            | 35                                            | 67                                            | 44                                            | 37                                            | 38                                            |
| <i>B</i> -factors                                     |                                               |                                               |                                               |                                               |                                               |                                               |                                               |
| Protein                                               | 124                                           | 101                                           | 117                                           | 118                                           | 121                                           | 142                                           | 149                                           |
| Ligand                                                | 187                                           | 116                                           | 142                                           | 142                                           | 153                                           | 155                                           | 180                                           |
| R.m.s. deviations                                     |                                               |                                               |                                               |                                               |                                               |                                               |                                               |
| Bond lengths (Å)                                      | 0.011                                         | 0.009                                         | 0.011                                         | 0.009                                         | 0.010                                         | 0.009                                         | 0.009                                         |
| Bond angles (°)                                       | 1.61                                          | 1.46                                          | 1.54                                          | 1.36                                          | 1.45                                          | 1.34                                          | 1.31                                          |

|                                                       | 5SX9                                          | 5SXA                                          | 5SXB                                          | 5SXC                                          | 5SXD                                          | 5SXE                                          | 5SXF                                          |
|-------------------------------------------------------|-----------------------------------------------|-----------------------------------------------|-----------------------------------------------|-----------------------------------------------|-----------------------------------------------|-----------------------------------------------|-----------------------------------------------|
| Fragment                                              | 14                                            | 10                                            | 23                                            | 8                                             | 22                                            | 19, 28                                        | 9                                             |
| <b>Data collection</b>                                |                                               |                                               |                                               |                                               |                                               |                                               |                                               |
| Space group                                           | p2 <sub>1</sub> 2 <sub>1</sub> 2 <sub>1</sub> |
| Cell dimensions<br><i>a</i> , <i>b</i> , <i>c</i> (Å) | 113.4, 116.1,<br>148.0                        | 115.2, 117.4,<br>152.1                        | 114.6, 116.8,<br>150.1                        | 114.7, 117.3,<br>150.3                        | 114.9, 116.4,<br>150.0                        | 113.8, 116.3,<br>149.0                        | 112.3, 115.9,<br>147.2                        |
| Resolution (Å)                                        | 50-3.50<br>(3.63-3.50)                        | 50-3.35<br>(3.42-3.30)                        | 50-3.30<br>(3.42-3.30)                        | 50.00-3.55<br>(3.68-3.55)                     | 50-3.50<br>(3.63-3.50)                        | 50-3.50<br>(3.63-3.50)                        | 50-3.45<br>(3.51-3.45)                        |
| <i>R</i> <sub>sym</sub>                               | 0.108 (0.874)                                 | 0.104 (0.862)                                 | 0.107 (0.988)                                 | 0.113 (0.848)                                 | 0.111 (0.883)                                 | 0.112 (0.952)                                 | 0.112 (0.938)                                 |
| <i>I</i> / $\sigma$ <i>I</i>                          | 19.2 (2.3)                                    | 24.4 (2.3)                                    | 23.7 (2.1)                                    | 19.9 (2.3)                                    | 18.2 (1.8)                                    | 15.7 (1.5)                                    | 21.1 (2.0)                                    |
| Completeness (%)                                      | 100 (100)                                     | 100 (100)                                     | 100 (100)                                     | 100 (100)                                     | 100 (100)                                     | 99.9 (100)                                    | 100 (100)                                     |
| Redundancy                                            | 7.2 (7.3)                                     | 7.3 (7.4)                                     | 7.3 (7.5)                                     | 7.3 (7.5)                                     | 7.2 (7.2)                                     | 6.5 (6.6)                                     | 7.3 (7.4)                                     |
| Unique reflections                                    | 24,477                                        | 30,528                                        | 31,023                                        | 25,308                                        | 25,936                                        | 25,370                                        | 25,565                                        |
| Total reflections                                     | 177,395                                       | 221,875                                       | 226,528                                       | 184,302                                       | 186,212                                       | 165,094                                       | 186,277                                       |
| X-ray Source<br>wavelength                            | 1.0                                           | 1.0                                           | 1.0                                           | 1.0                                           | 1.0                                           | 1.0                                           | 1.0                                           |
| <b>Refinement</b>                                     |                                               |                                               |                                               |                                               |                                               |                                               |                                               |
| Resolution (Å)                                        | 91.34-3.52                                    | 92.91-3.35                                    | 92.16-3.30                                    | 92.46-3.54                                    | 91.97-3.5                                     | 91.65-3.51                                    | 91.07-3.46                                    |
| No. reflections                                       | 23,166                                        | 28,743                                        | 29,298                                        | 23,959                                        | 24,555                                        | 24,018                                        | 24,200                                        |
| <i>R</i> <sub>work</sub> / <i>R</i> <sub>free</sub>   | 0.192/0.277                                   | 0.221/0.274                                   | 0.204/0.278                                   | 0.193/0.267                                   | 0.194/0.277                                   | 0.191/0.271                                   | 0.194/0.266                                   |
| No. atoms                                             |                                               |                                               |                                               |                                               |                                               |                                               |                                               |
| Protein                                               | 10,583                                        | 10,476                                        | 10,475                                        | 10,305                                        | 10,659                                        | 10,483                                        | 9,960                                         |
| Ligand                                                | 19                                            | 44                                            | 29                                            | 29                                            | 31                                            | 35                                            | 22                                            |
| <i>B</i> -factors                                     |                                               |                                               |                                               |                                               |                                               |                                               |                                               |
| Protein                                               | 134                                           | 136                                           | 121                                           | 138                                           | 138                                           | 139                                           | 129                                           |
| Ligand                                                | 145                                           | 188                                           | 146                                           | 168                                           | 159                                           | 181                                           | 157                                           |
| R.m.s. deviations                                     |                                               |                                               |                                               |                                               |                                               |                                               |                                               |
| Bond lengths (Å)                                      | 0.011                                         | 0.009                                         | 0.010                                         | 0.011                                         | 0.010                                         | 0.011                                         | 0.010                                         |
| Bond angles (°)                                       | 1.56                                          | 1.33                                          | 1.50                                          | 1.53                                          | 1.52                                          | 1.54                                          | 1.48                                          |

|                                                       | 5SXI<br>25                                    | 5SXJ<br>29                                    | 5SXX<br>18                                    |
|-------------------------------------------------------|-----------------------------------------------|-----------------------------------------------|-----------------------------------------------|
| <b>Data collection</b>                                |                                               |                                               |                                               |
| Space group                                           | p2 <sub>1</sub> 2 <sub>1</sub> 2 <sub>1</sub> | p2 <sub>1</sub> 2 <sub>1</sub> 2 <sub>1</sub> | p2 <sub>1</sub> 2 <sub>1</sub> 2 <sub>1</sub> |
| Cell dimensions<br><i>a</i> , <i>b</i> , <i>c</i> (Å) | 114.2, 116.8,<br>150.5                        | 114.8, 117.9,<br>151.0                        | 113.3, 115.8,<br>149.0                        |
| Resolution (Å)                                        | 50-3.40<br>(3.52-3.40)                        | 50-3.45<br>(3.57-3.45)                        | 50-3.55<br>(3.61-3.55)                        |
| <i>R</i> <sub>sym</sub>                               | 0.133 (0.907)                                 | 0.129 (0.955)                                 | 0.137 (0.934)                                 |
| <i>I</i> / $\sigma I$                                 | 18.8 (1.7)                                    | 25.8 (2.5)                                    | 18.7 (1.7)                                    |
| Completeness (%)                                      | 98.6 (96.8)                                   | 99.7 (99.8)                                   | 99.7 (99.6)                                   |
| Redundancy                                            | 5.1 (3.6)                                     | 7.0 (5.7)                                     | 5.0 (6.4)                                     |
| Unique reflections                                    | 28,264                                        | 28,041                                        | 24,161                                        |
| Total reflections                                     | 144,489                                       | 197,575                                       | 155,578                                       |
| X-ray Source<br>wavelength                            | 1.0                                           | 1.0                                           | 1.0                                           |
| <b>Refinement</b>                                     |                                               |                                               |                                               |
| Resolution (Å)                                        | 92.27-3.38                                    | 92.94-3.42                                    | 91.45-3.55                                    |
| No. reflections                                       | 26,461                                        | 26,321                                        | 22,868                                        |
| <i>R</i> <sub>work</sub> / <i>R</i> <sub>free</sub>   | 0.201/0.278                                   | 0.212/0.279                                   | 0.193/0.277                                   |
| No. atoms                                             |                                               |                                               |                                               |
| Protein                                               | 10,332                                        | 10,370                                        | 10,791                                        |
| Ligand                                                | 28                                            | 50                                            | 19                                            |
| <i>B</i> -factors                                     |                                               |                                               |                                               |
| Protein                                               | 132                                           | 138                                           | 142                                           |
| Ligand                                                | 161                                           | 188                                           | 147                                           |
| R.m.s. deviations                                     |                                               |                                               |                                               |
| Bond lengths (Å)                                      | 0.010                                         | 0.010                                         | 0.011                                         |
| Bond angles (°)                                       | 1.50                                          | 1.43                                          | 1.54                                          |
